# Supplementary material for: Computational and Experimental Approaches Identify Beta-Blockers as Potential SARS-CoV-2 Spike Inhibitors
Source: PubMed Central journal article supplement — ACS Omega. 2022 Aug 8;7(32):27950–8. doi: 10.1021/acsomega.2c01707 (PMC9380819; doi:10.1021/acsomega.2c01707), 2022-08-08
Supplement: ao2c01707_si_001.pdf [file ao2c01707_si_001.pdf]

## Supporting Information

### Computational and Experimental Approaches Identify Beta-blockers as Potential SARS-CoV-2 Spike Inhibitors

Ana C. Puhl<sup>†\*</sup>, Melina Mottin<sup>‡, §</sup>, Carolina Q. Sacramento<sup>&, #</sup>, Tatyana Almeida Tavella<sup>%</sup>, Gabriel Gonçalves Dias<sup>‡</sup>, Natalia Fintelman-Rodrigues<sup>&, #</sup>, Jairo R. Temerozo<sup>%, μ</sup>, Suelen S. G. Dias<sup>&</sup>, Paulo Ricardo Pimenta da Silva Ramos<sup>‡</sup>, Eric M. Merten<sup>‡</sup>, Kenneth H. Pearce<sup>‡, £</sup>, Fabio Trindade Maranhão Costa<sup>%</sup>, Lakshmanane Premkumar<sup>¶</sup>, Thiago Moreno L. Souza<sup>&, #</sup>, Carolina Horta Andrade<sup>‡\*</sup> and Sean Ekins<sup>†\*</sup>

<sup>†</sup> Collaborations Pharmaceuticals, Inc., 840 Main Campus Drive, Lab 3510, Raleigh, NC 27606, USA.

<sup>‡</sup> LabMol - Laboratory of Molecular Modeling and Drug Design, Faculdade de Farmácia, Universidade Federal de Goiás, Goiânia, GO, 74605-170, Brazil.

<sup>§</sup> Pathogen-Host Interface Laboratory, Department of Cell Biology, University of Brasilia, Brasilia, Brazil.

<sup>&</sup> Laboratory of Immunopharmacology, Oswaldo Cruz Institute, Fiocruz, Rio de Janeiro, RJ, Brazil

<sup>#</sup> Center of Technological Development in Health (CDTS)/National Institute of Science and Technology for Innovation on Neglected Population Diseases (INCT-IDPN), Rio de Janeiro, RJ, Brazil

% Laboratory of Tropical Diseases – Prof. Dr. Luiz Jacinto da Silva, Department of Genetics, Evolution, Microbiology and Immunology, University of Campinas-UNICAMP, Campinas, SP, Brazil.

¥ Laboratory on Thymus Research, Oswaldo Cruz Institute, Fiocruz, Rio de Janeiro, RJ, Brazil.

µ National Institute for Science and Technology on Neuroimmunomodulation (INCT/NIM), Oswaldo Cruz Institute, Fiocruz, Rio de Janeiro, RJ, Brazil.

± Center for Integrative Chemical Biology and Drug Discovery, Chemical Biology and Medicinal Chemistry, Eshelman School of Pharmacy, University of North Carolina, Chapel Hill, North Carolina 27599, USA.

£ UNC Lineberger Comprehensive Cancer Center, Chapel Hill, North Carolina 27599, USA.

¶ Department of Microbiology and Immunology, University of North Carolina School of Medicine, Chapel Hill, NC 27599, USA.

\*To whom correspondence should be addressed: Ana C. Puhl, E-mail address: [ana@collaborationspharma.com](mailto:ana@collaborationspharma.com); Carolina Horta Andrade E-mail address: [carolina@ufg.br](mailto:carolina@ufg.br), Sean Ekins, E-mail address: [sean@collaborationspharma.com](mailto:sean@collaborationspharma.com), Phone: +1 215-687-1320.

**Table S1: Compounds tested using nanoDSF.**

| <b>Compound</b> | <b>T<sub>m</sub></b> | <b>ΔT<sub>m</sub></b> |
|-----------------|----------------------|-----------------------|
| Pindolol        | 58.6°C               | -0.2°C                |
| Carvedilol      | 58.0°C               | 0.3°C                 |
| Carteolol       | 58.4°C               | 0.0                   |

**Table S2: Cytotoxicity of compounds in Vero and A549 cells**

| <b>Compound</b>             | <b>CC<sub>50</sub> (μM)</b> |             |
|-----------------------------|-----------------------------|-------------|
|                             | <b>Vero</b>                 | <b>A549</b> |
| Atenolol                    | (133 – 400)                 | (133 - 400) |
| Carvedilol                  | 29.2                        | 17.8        |
| Pindolol                    | (20 – 60)                   | -           |
| Propranolol                 | 86.1                        | 73.3        |
| Carteolol                   | (133 – 400)                 | (133 – 400) |
| (±)-Bisoprolol hemifumarate | (10 – 30)                   | -           |

\* Numbers in parentheses represent the concentration range containing the compound

CC<sub>50</sub>

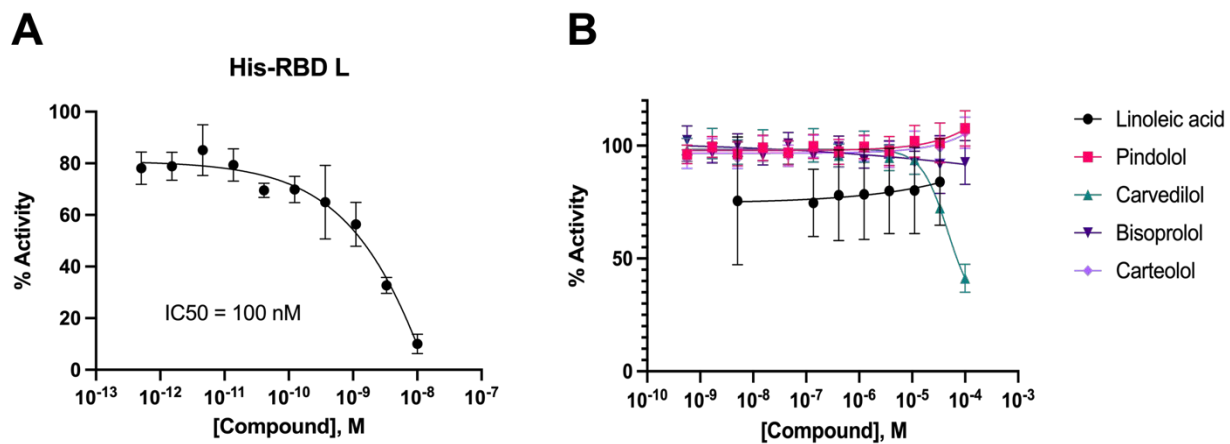

**Figure S1:** Lumit SARS-CoV 2 Spike RBD: hACE2 Immunoassay. **A)** Positive control, his-RBD showed an IC<sub>50</sub> 100 nM. **B)** Beta blockers and linoleic acid.
